# Supplementary material for: Enhanced hydriding–dehydriding performance of 2LiBH4–MgH2 composite by the catalytic effects of transition metal chlorides
Source: Royal Society of Chemistry journal article supplement (doi:10.1039/c2jm33374k), 2012-01-01
Supplement: c2jm33374k.pdf [file c2jm33374k.pdf]

## Supplementary Information:

### Enhanced hydriding-dehydriding performance of $2\text{LiBH}_4\text{-MgH}_2$ composite by the catalytic effects of transition metal chlorides

Jie Shao, Xuezhang Xiao, Lixin Chen\*, Xiulin Fan, Shouquan Li, Hongwei Ge, Qidong Wang

Key Laboratory of Advanced Materials and Applications for Batteries of Zhejiang Province and  
Department of Materials Science and Engineering, Zhejiang University, Hangzhou 310027, China

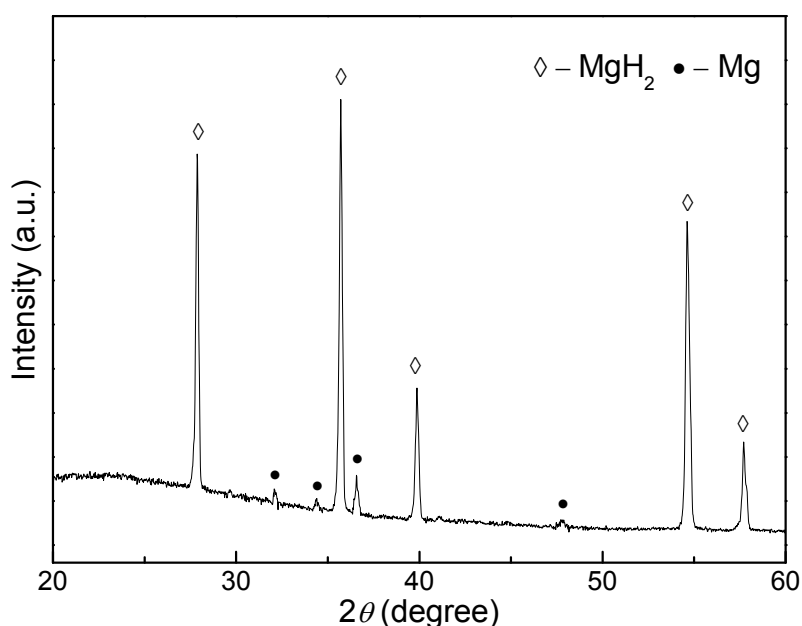

Figure S1. XRD pattern of the as-purchased  $\text{MgH}_2$  from Alfa Aesar.

Table S1. Peak Temperatures for Each Sample in DSC Profiles.

| Peak / °C                                             | A     | B     | C     | D     |
|-------------------------------------------------------|-------|-------|-------|-------|
| Sample                                                |       |       |       |       |
| undoped                                               | 116.5 | 293.1 | 371.5 | 448.3 |
| $2\text{LiBH}_4\text{-MgH}_2\text{-}0.1\text{FeCl}_2$ | 103.4 | 291.9 | 330.5 | 434.9 |
| $2\text{LiBH}_4\text{-MgH}_2\text{-}0.1\text{CoCl}_2$ | 104.2 | 287.7 | 311.2 | 427.6 |
| $2\text{LiBH}_4\text{-MgH}_2\text{-}0.1\text{NiCl}_2$ | 104.9 | 286.1 | 297.5 | 408.4 |

\* Corresponding author. Tel./fax: +86 571 8795 1152.  
E-mail address: lxchen@zju.edu.cn (L.X. Chen).

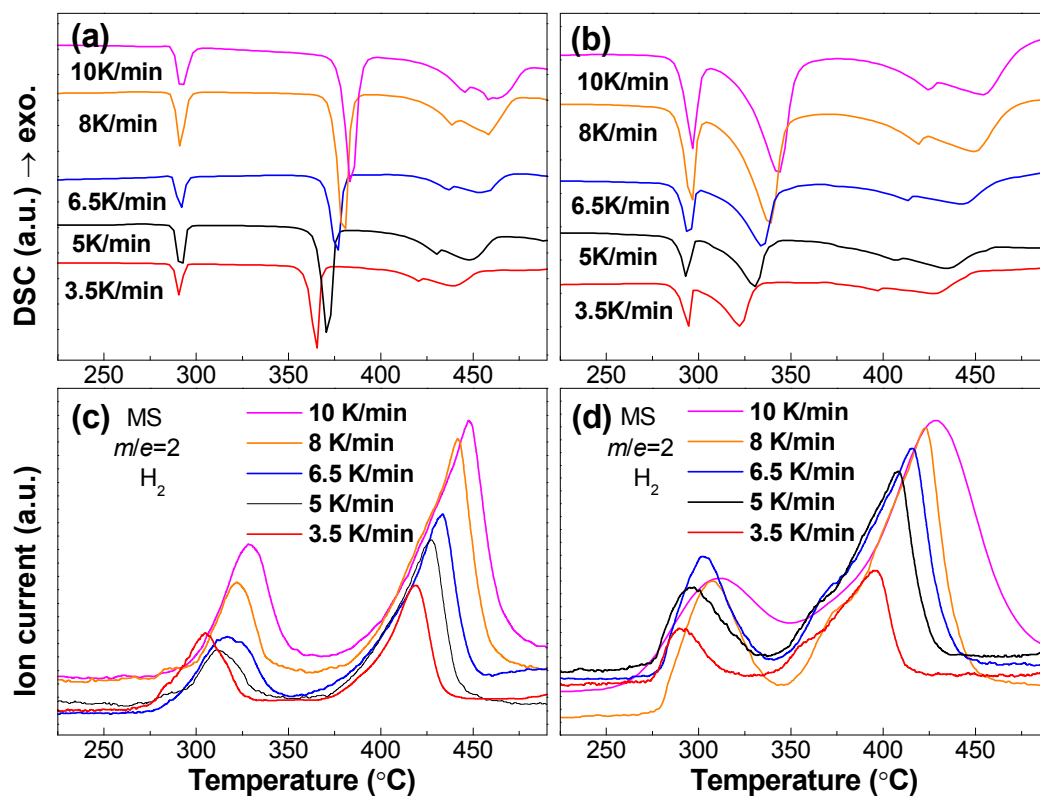

Figure S2. DSC-MS curves of the as-milled  $2\text{LiBH}_4\text{-MgH}_2\text{-}0.1\text{MCl}_2$  ( $M = \text{Fe}, \text{Co}, \text{Ni}$ ) composites at various heating rates. (a) undoped, (b) doped with  $0.1\text{FeCl}_2$ , (c) doped with  $0.1\text{CoCl}_2$ , (d) doped with  $0.1\text{NiCl}_2$ .

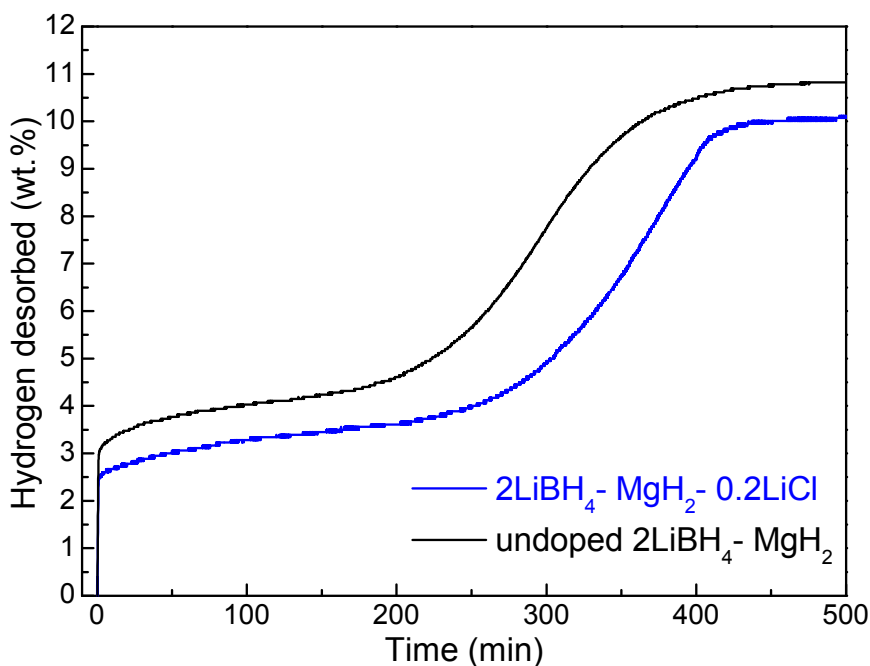

Figure S3. Isothermal dehydrogenation curves of the  $2\text{LiBH}_4\text{-MgH}_2\text{-}0.2\text{LiCl}$  sample under 4 bar  $\text{H}_2$  at  $430^\circ\text{C}$ .

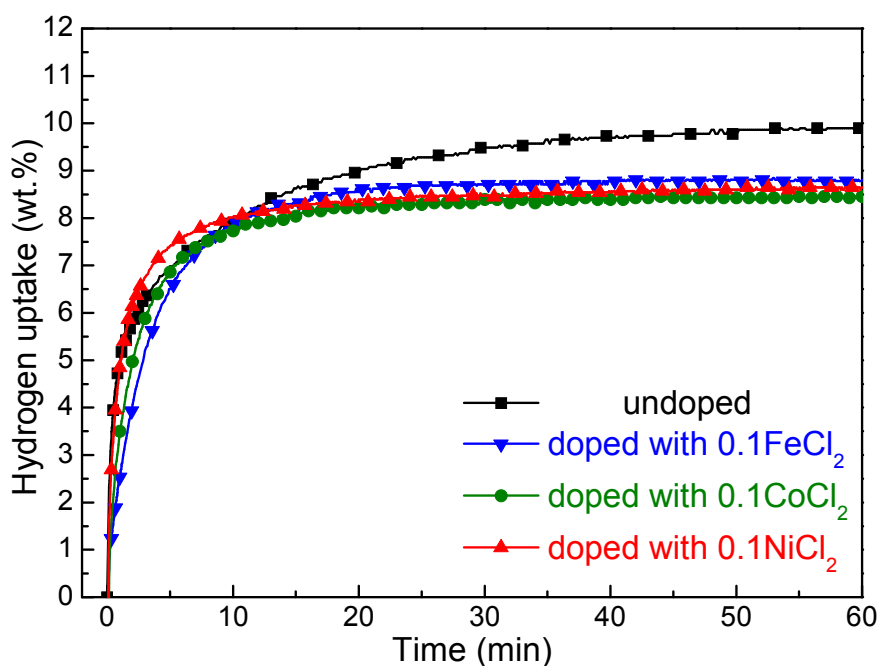

Figure S4. Isothermal rehydrogenation curves of the dehydrogenated  $2\text{LiBH}_4\text{-MgH}_2\text{-}0.1\text{MCl}_2$  ( $M = \text{Fe}, \text{Co}, \text{Ni}$ ) composites under 80 bar  $\text{H}_2$  at 430 °C.

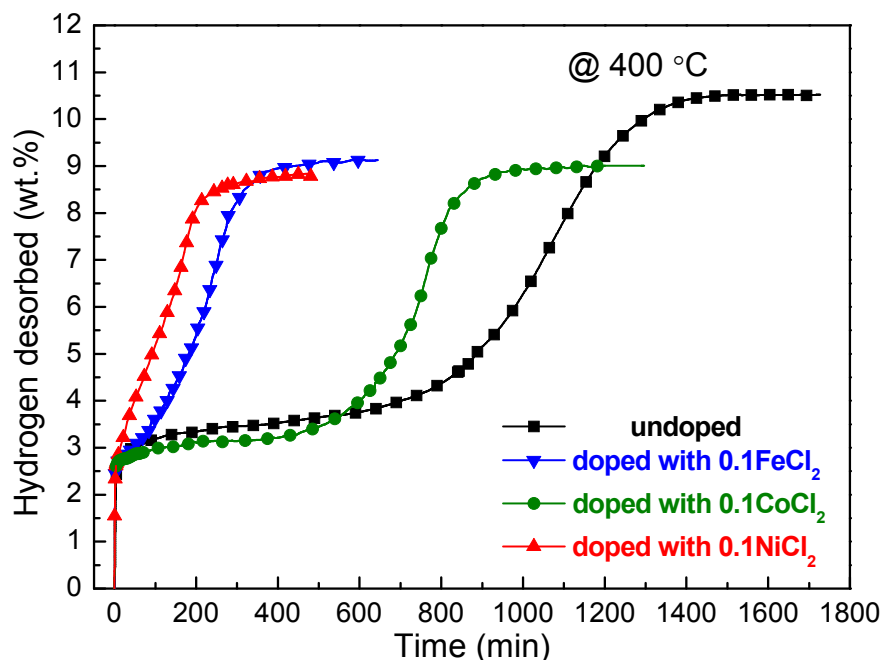

Figure S5. Isothermal dehydrogenation curves of the as-milled  $2\text{LiBH}_4\text{-MgH}_2\text{-}0.1\text{MCl}_2$  ( $M = \text{Fe}, \text{Co}, \text{Ni}$ ) samples under 4 bar hydrogen back pressure at 400 °C.

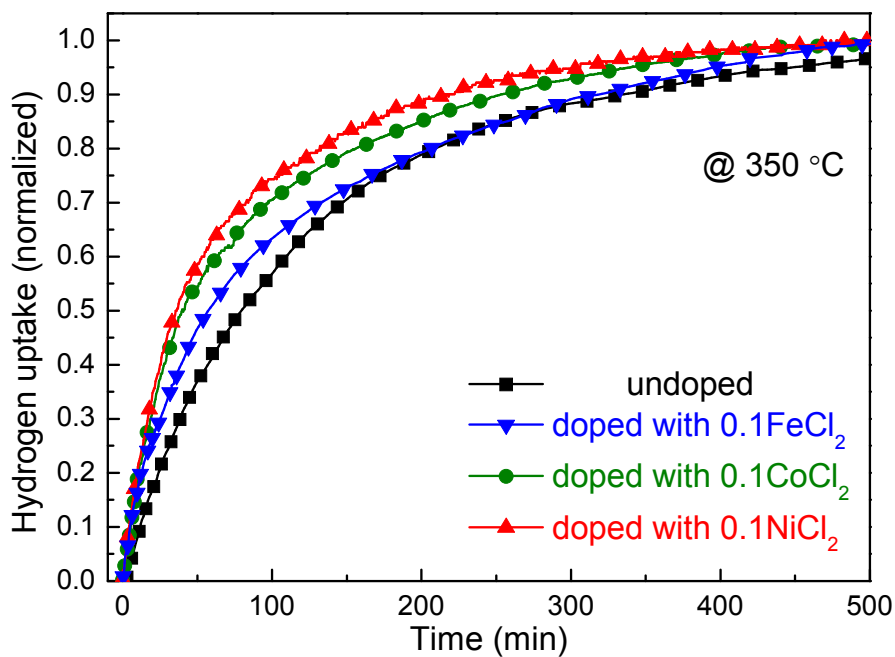

Figure S6. Normalized isothermal rehydrogenation curves of the dehydrogenated  $2\text{LiBH}_4\text{-MgH}_2\text{-}0.1\text{MCl}_2$  ( $M = \text{Fe}, \text{Co}, \text{Ni}$ ) composites under 80 bar  $\text{H}_2$  at 350 °C.

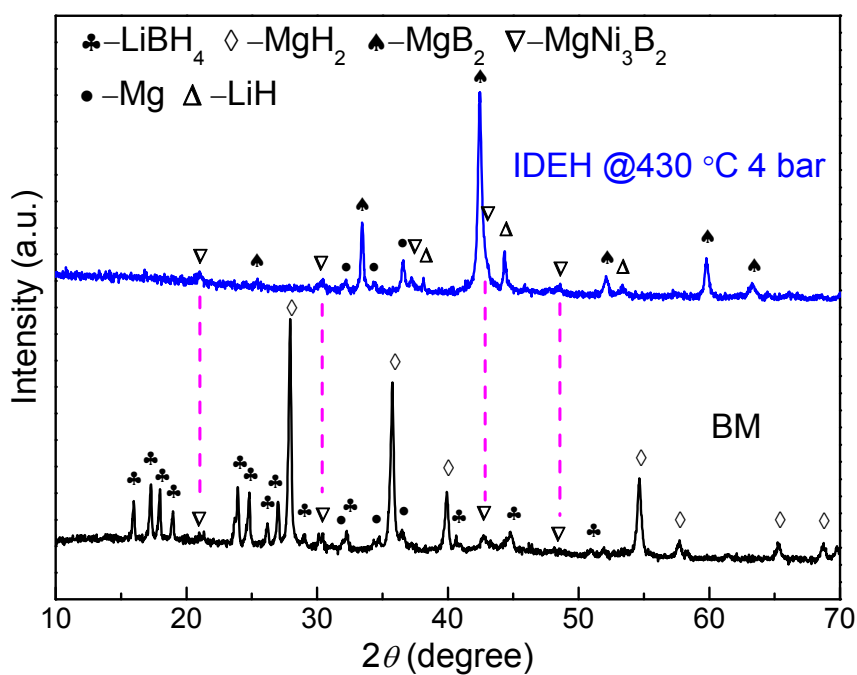

Figure S7. XRD patterns of the as-milled and isothermal dehydrogenated  $2\text{LiBH}_4\text{-MgH}_2\text{-}0.033\text{MgNi}_3\text{B}_2$  sample.
